# Supplementary material for: Heterobimetallic lithium alkyltriimido aluminate cages containing the [R′Al(NR)3]4−tetraanion (R′ = Bun, Et; R = 2-OMeC6H4)
Source: Royal Society of Chemistry journal article supplement (doi:10.1039/b307589c), 2003-01-01
Supplement: b307589c.doc [file b307589c.doc]

# Supplementary data

Synthesis of **1**: BunLi (47 cm3, 1.6 mol dm-3 in hexanes, 75 mmol) was added slowly to a solution of *o*-anisidine (8.5 cm3, 75 mmol) in thf (100 cm3) and the mixture was stirred at room temperature for 30 minutes. AlCl3 (3.33g, 25 mmol) was added and the mixture was stirred (room temperature) for 50 minutes heated to reflux and stirred for a further 1 hour at room temperature. The solvent was removed *in vacuo* and the residue was dissolved in toluene (100 cm3), heated to reflux, filtered while hot (porosity 3 sinter with celite) and washed with 2 x 20 cm3 hot toluene. Colourless micro-needles of **1** were isolated after storage of the filtrate at –15 oC for 24 hours. Yield: 2.65 g (27 %); mp: 154-158 oC to an off-white oil, 1H NMR (+25 oC, 270 MHz, [D8]-toluene): 6.90-6.40 (collection of m, 12H, -C6**H**4), 3.36-3.32 (collection of overlapping s, 9H, -C6H4(2-OC**H3**); IR (nujol mull): [cm-1] = 3405 and 3388 (N-H stretch); Elem. Anal.: calc. for AlC21H24N3O3: C 64.12%, H 6.11%, N 10.69%, Found: C 63.90%, H 6.02%, N 10.51%.

Synthesis of **2**.thf: BunLi (1.9 cm3, 1.6 mol dm-3 in hexanes, 3 mmol) was added dropwise to an ice cold slurry of **1** (0.39 g, 1 mmol) in toluene (20 cm3). The mixture was stirred at room temperature for 45 minutes and heated to reflux to yield a bright yellow cloudy solution. The solvent was removed *in vacuo* and the resulting bright yellow solid was dissolved in thf (15cm3) and stored at –15 oC. Hexane (14 cm3) was added and colourless needles of complex **2** were obtained after storage at 5 oC for one week. The crystalline product is a mixture of **2**.thf and lithiated *o*-anisidine. We have been unable to separate these two materials and hence have been unable to obtain satisfactory elemental analysis and melting points. However, we were able to identify peaks from the lithiated amine in the NMR spectrum (these are not quoted below) and the integration shows that **2** comprises *ca.* 70% of the isolated material. On this basis, the yield of **2** is *ca.* 19% (0.212 g of solid product were isolated from the reaction).

1H NMR (+25 oC, 300 MHz, [D8]-thf):  = 6.46-5. 49 (collection of m, 12H, -NC6**H4**), 3.53 (m, thf), 2.99 (s, 9H, -N(2-OC**H**3)C6H4), 1.69 (m, thf), 1.20-0.77 (collection of broad m, -C**H2**C**H2**C**H2**C**H3**).

Single crystal X-ray diffraction data: crystal size: 0.25 x 0.25 x 0.20 mm, C86H132Al2Li8N6O15 = 1599.5, monoclinic, space group *Cc*, *Z* = 4, *a* = 18.2874(3) Å, *b* = 20.0934(4) Å, *c* = 24.9608(5) Å, ** = 105.1140(10) °, *V* = 8854.7(3) Å3, *Dc* = 1.200 Mg/m3, **(Cu-K) = 0.809 mm-1, T = 100(2) K. The total data set was a sphere. Of a total of 34236 reflections collected, 14343 were independent (*Rint* = 0.0462). X-ray measurements were taken using a Bruker PROTEUM CCD area-detector diffractometer with Cu-K radiation ( = 1.54184 Å).1 The structure was solved by direct methods and refined by full-matrix least squares on *F*2. Absorption corrections were applied based on multiple and symmetry-equivalent measurements. Final *R*1 = 0.0796 [for 11381 reflections with *I*>2(*I*)] and *wR*2 = 0.2162 (all data).

Synthesis of **3**.3thf: BunLi (7.5 cm3, 1.6 mol dm-3 in hexanes, 12 mmol) was added to an ice cold stirred solution of 2-methoxyaniline (1.36 cm3, 12 mmol) in diethyl ether (30 cm3). After stirring for 30 minutes, EtAlCl2 (2.2 cm3, 1.8 mol dm-3 in toluene, 4 mmol) was added slowly, and a further stirring for 1 hour at room temperature gave a white precipitate. This was filtered (porosity 3 sinter with celite) and washed with ether (4 cm3). The solvent was removed from the filtrate *in vacuo* and the resulting viscous oil was dissolved in thf (20 cm3) and cooled. BunLi (7.5 cm3, 1.6 mol dm-3 in hexanes, 12 mmol) was added slowly with stirring to give a bright yellow solution. Colourless crystalline blocks of complex **3** were obtained after storage at –15 oC for 18 hours. The product crystallises with three molecules of thf in the crystal lattice which are removed when the sample is placed under vacuum prior to isolation. The following data are on the lattice solvent free material.

Yield: 1.62 g (55%); mp: 101-106 oC to form a yellow oil; 1H NMR (+25 oC, 300 MHz, [D8]-thf):  = 6.80-5.40 (collection of m, 12H, -NC6**H4**), 3.52 (m, thf), 2.90 (s, 9H, -N(2-OC**H3**)C6H4), 1.68 (m, thf), 1.18 (t, 3H, -CH2C**H3**, 3JHH 7 Hz) 0.78 (q, 2H, -C**H2**CH3, 3JHH 7 Hz); IR (nujol mull): [cm-1] = no distinguishing absorptions; Elemental analysis: calc. for C78H116Al2Li8N6O14: C 63.68%, H 7.95%, N 5.71%, found: C 63.36%, H 8.13%, N 5.71%.

Crystal data for **3**.3thf: crystal size: 0.2x0.2x0.2 mm, C90H140Al2Li8N6O17, *M* = 1687.6, monoclinic, space group *P*21/*n*, *Z* = 4, *a* = 15.547(3) Å, *b* = 22.129(4) Å, *c* = 27.386(6) Å, ** = 101.84(3) °, *V* = 9221(3) Å3, *Dc* = 1.216 Mg/m3, **(Mo-K) = 0.098 mm-1, T = 100(2) K. The total data set was a hemisphere. Of a total of 105225 reflections collected, 21279 were independent (*R*int = 0.0567). X-ray measurements were made using a Bruker APEX CCD area-detector diffractometer with Mo-K radiation ( = 0.71073 Å).1 The structure was solved by direct methods and refined by least squares on F2 values for all reflections.2 Absorption corrections were applied, based on multiple and symmetry-equivalent measurements.3 Final *R*1 = 0.0497 [for 14670 reflections with *I*>2(*I*)] and *wR*2 = 0.1402 (all data).

# Synthesis of 4.thf: BunLi (3.75 cm3, 1.6 mol dm-3 in hexanes, 6 mmol) was added to an ice cold stirred solution of 2-methoxyaniline (0.68 cm3, 6 mmol) in diethyl ether (30 cm3). The solution was allowed to warm to room temperature and was stirred for 20 minutes. The mixture was cooled and PhBCl2 (0.26 cm3, 2 mmol) was added slowly, stirring was continued for a further 40 minutes at room temperature to yield a white precipitate. The reaction mixture was warmed and filtered (porosity 3 sinter with celite) and washed with ether (4 cm3). The solvent was removed *in vacuo* and the resulting viscous oil was dissolved in thf (20 cm3) and cooled. BunLi (3.75 cm3, 1.6 mol dm-3 in hexanes, 6 mmol) was added slowly with stirring to give a bright yellow solution. The solution was layered with hexane and colourless crystalline blocks of complex 4 were obtained after storage at room temperature for 3 days. Complex 4 contains one molecule of thf in the crystal lattice for every dimeric molecule of 4. This is removed upon placing the material under vacuum prior to isolation. The data presented here are on the lattice solvent free material.

Yield: 0.754 g (91 %); mp: decomp. 105-108 oC to a black solid; 1H NMR (+25 oC, 300 MHz, [D8]-thf):  = 6.95 – 6.70 (collection of m, 5H, BC6**H5**), 6.30 – 5.95 (collection of m, 8H, NC6**H4**), 3.50 (m, thf), 2.89 (broad s, 6H, OC**H3**), 1.67 (m, thf); 11B NMR (+25 oC, 96.2 MHz, [D8]-thf):  = 33.5 ppm; IR (nujol mull): [cm-1] = no distinguishing absorptions; Elemental analysis: calc. for C28H54B2Li4N4O6: C 69.26%, H 6.54%, N 6.73%, Found: C 68.81%, H 6.41%, N 6.60%.

Single crystal X-ray diffraction data: crystal size: 0.25 x 0.25 x 0.20 mm, C52H62B2Li4N4O7 = 904.46, monoclinic, space group *Cc*, *Z* = 4, *a* = 16.980(3) Å, *b* = 14.215(3) Å, *c* = 21.294(4) Å, ** = 107.21(3) °, *V* = 4909.6(17) Å3, *Dc* = 1.213 Mg/m3, **(Mo-K) = 0.078 mm-1, T = 100(2) K. The total data set was a hemisphere. Of a total of 27513 reflections collected, 5640 were independent (*Rint* = 0.0288). X-ray measurements were made using a Bruker APEX CCD area-detector diffractometer with Mo-K radiation ( = 0.71073 Å).1 The structure was solved by direct methods and refined by full-matrix least squares on *F*2.2 Absorption corrections were applied based on multiple and symmetry-equivalent measurements.3 Final *R*1 = 0.0511 [for 4459 reflections with *I*>2(*I*)] and *wR*2 = 0.1536 (all data).

1 SMART Software, Siemens Analytical X-ray Instruments Inc., Madison, WI, 1994, SMART diffractometer control software, Siemens Analytical X-ray Instruments Inc., Madison, WI, 1994.

2 G. M. Sheldrick, SHELXTL, Siemens Analytical X-ray Instruments Inc., Madison, WI, 1995.

3 SADABS absorption correction software, Siemens Analytical X-ray Instruments Inc., Madison, WI, 1994.
